# Supplementary material for: Suspected sepsis: summary of NICE guidance
Source: HighWire-hosted journal article supplement (doi:10.1136/bmj.i4030), 2016-08-11

# Visual summary NICE sepsis guidance

How to assess risk and identify appropriate level of monitoring and management for suspected sepsis

**Evidence level**  
Based on the opinion of the guideline development committee, supported by generally very low quality evidence

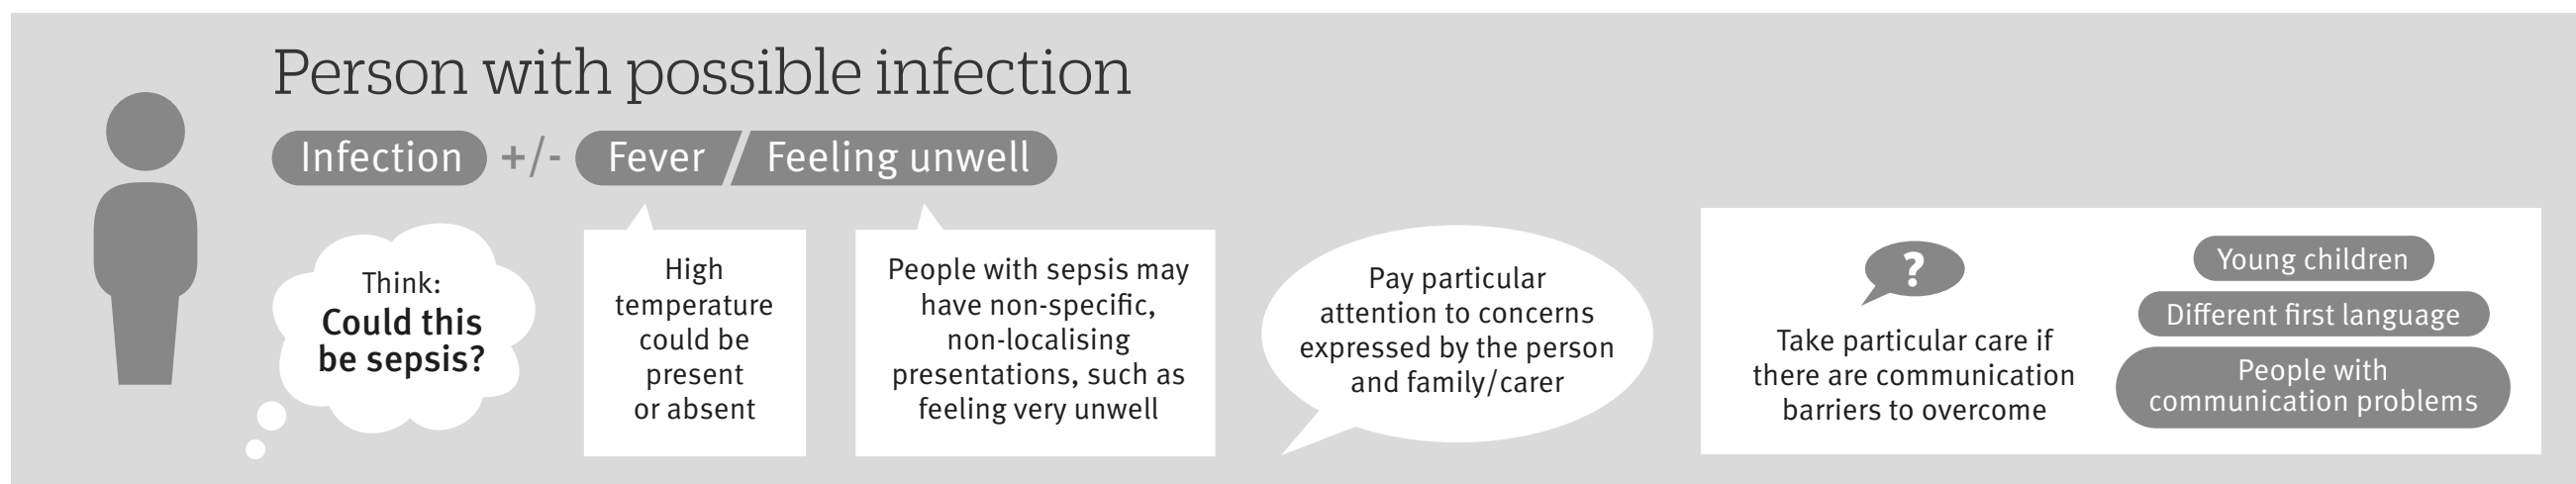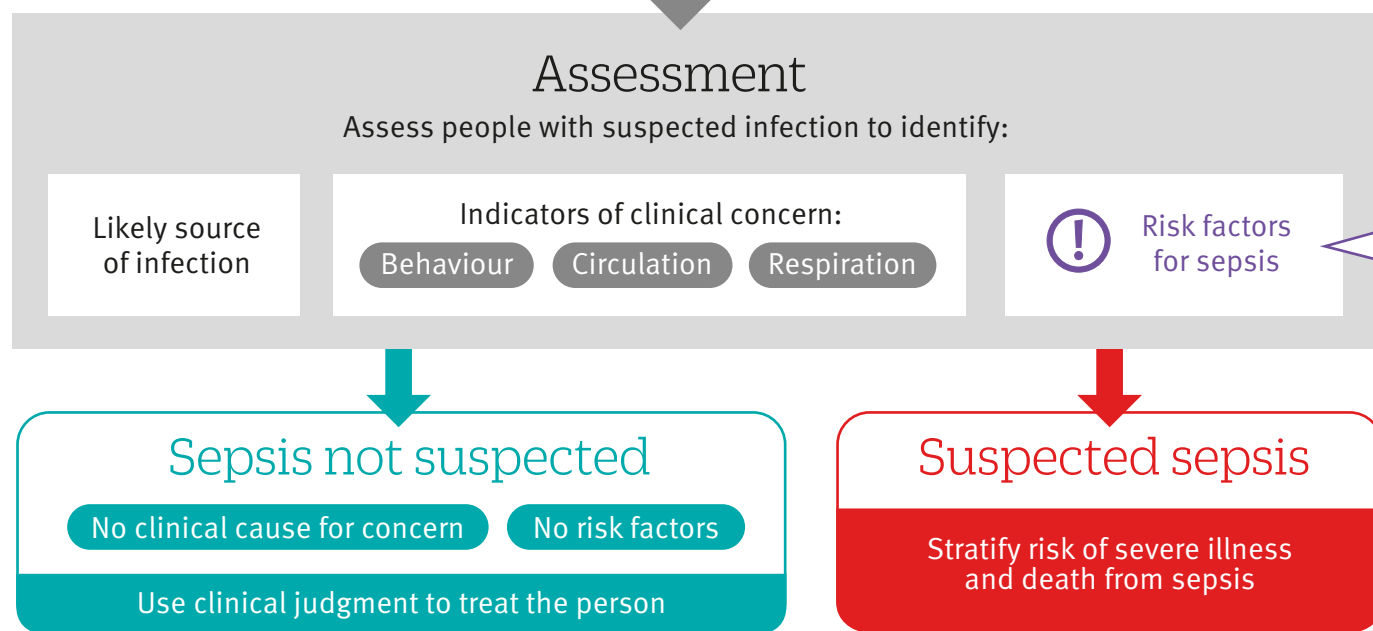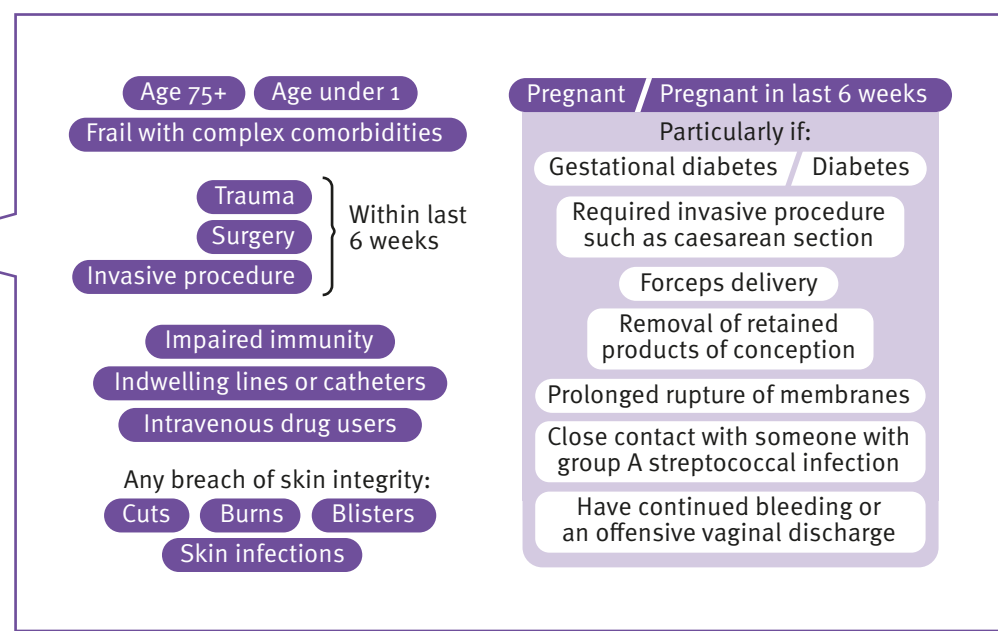

**Detailed risk assessment**

| Age (years)                  | Under 1                                                                                                    | 1-2              | 3-4              | 5                              | 6-7              | 8-11             | 12+ and adults                                                                        |
|------------------------------|------------------------------------------------------------------------------------------------------------|------------------|------------------|--------------------------------|------------------|------------------|---------------------------------------------------------------------------------------|
| <b>Behaviour and history</b> | <b>H</b> Weak, high-pitched or continuous cry                                                              |                  |                  |                                |                  |                  | <b>H</b> Objective evidence of new mental state                                       |
|                              | <b>H</b> Appears ill to a healthcare professional                                                          |                  |                  |                                |                  |                  | <b>M</b> History from patient, friend or relative of altered behaviour / mental state |
|                              | <b>H</b> Does not wake or, if roused, does not stay awake                                                  |                  |                  |                                |                  |                  | <b>M</b> Deterioration of functional ability                                          |
|                              | <b>H</b> No response to social cues                                                                        |                  |                  |                                |                  |                  | <b>M</b> Impaired immune system                                                       |
|                              | <b>M</b> Parent or carer concern that child is behaving differently from usual                             |                  |                  |                                |                  |                  | <b>M</b> Trauma, surgery or procedure in last 6 weeks                                 |
|                              | <b>M</b> Decreased activity                                                                                |                  |                  |                                |                  |                  |                                                                                       |
|                              | <b>M</b> Not responding normally to social cues                                                            |                  |                  | <b>M</b> Not behaving normally |                  |                  |                                                                                       |
|                              | <b>M</b> No smile                                                                                          |                  |                  |                                |                  |                  |                                                                                       |
|                              | <b>M</b> Wakes only with prolonged stimulation                                                             |                  |                  |                                |                  |                  |                                                                                       |
|                              | <b>M</b> Poor feeding                                                                                      |                  |                  |                                |                  |                  |                                                                                       |
| <b>Breathing</b>             | <b>Breaths per minute (resting rate)</b>                                                                   |                  |                  |                                |                  |                  |                                                                                       |
|                              | <b>H</b> 60+                                                                                               | <b>H</b> 50+     | <b>H</b> 40+     | <b>H</b> 29+                   | <b>H</b> 27+     | <b>H</b> 25+     | <b>H</b> 25+                                                                          |
|                              | <b>M</b> 50-59                                                                                             | <b>M</b> 40-49   | <b>M</b> 35-39   | <b>M</b> 24-28                 | <b>M</b> 24-26   | <b>M</b> 22-24   | <b>M</b> 21-24                                                                        |
|                              | <b>H</b> Grunting                                                                                          |                  |                  |                                |                  |                  | <b>H</b> New requirement of oxygen                                                    |
|                              | <b>H</b> Apnoea                                                                                            |                  |                  |                                |                  |                  | 0.4+ FiO <sub>2</sub> to maintain saturation above 92% or 88% in known COPD*          |
|                              | <b>H</b> Oxygen saturation 90% or less in air                                                              |                  |                  |                                |                  |                  |                                                                                       |
|                              | <b>M</b> Oxygen saturation 92% or less in air                                                              |                  |                  |                                |                  |                  |                                                                                       |
|                              | <b>M</b> Nasal flaring                                                                                     |                  |                  |                                |                  |                  |                                                                                       |
|                              | <b>M</b> Crackles in the chest                                                                             |                  |                  |                                |                  |                  |                                                                                       |
| <b>Circulation</b>           | <b>Heart rate (beats per minute)</b>                                                                       |                  |                  |                                |                  |                  |                                                                                       |
|                              | <b>H</b> 160+                                                                                              | <b>H</b> 150+    | <b>H</b> 140+    | <b>H</b> 130+                  | <b>H</b> 120+    | <b>H</b> 115+    | <b>H</b> 131+                                                                         |
|                              | <b>M</b> 150-159                                                                                           | <b>M</b> 140-149 | <b>M</b> 130-139 | <b>M</b> 120-129               | <b>M</b> 110-119 | <b>M</b> 105-114 | <b>M</b> 91-130                                                                       |
|                              | <b>H</b> Less than 60 beats per minute                                                                     |                  |                  |                                |                  |                  | <b>H</b> Systolic BP <sup>2</sup> 90 mmHg or less or 40+ mmHg below normal            |
|                              | <b>M</b> Capillary refill time 3+ seconds                                                                  |                  |                  |                                |                  |                  | <b>M</b> Systolic BP <sup>2</sup> 91-100 mmHg                                         |
|                              | <b>M</b> Cold hands / feet                                                                                 |                  |                  |                                |                  |                  | <b>M</b> Pregnant: 100-130 BPM                                                        |
|                              | <b>M</b> Leg pain                                                                                          |                  |                  |                                |                  |                  | <b>M</b> New onset arrhythmia                                                         |
| <b>Skin</b>                  | <b>Colour of skin / lips / tongue is mottled or ashen or blue</b>                                          |                  |                  |                                |                  |                  |                                                                                       |
|                              | <b>H</b> Non-blanching rash                                                                                |                  |                  |                                |                  |                  |                                                                                       |
|                              | <b>H</b> Reduced skin turgor                                                                               |                  |                  |                                |                  |                  |                                                                                       |
|                              | <b>M</b> Pallor of skin, lips or tongue                                                                    |                  |                  |                                |                  |                  |                                                                                       |
|                              | <b>M</b> Signs of infection: Increased redness, Swelling or discharge at surgical site, Breakdown of wound |                  |                  |                                |                  |                  |                                                                                       |
| <b>Temperature</b>           | <b>H</b> Under 36°C                                                                                        |                  |                  |                                |                  |                  |                                                                                       |
|                              | <b>M</b> Under 36°C                                                                                        |                  |                  |                                |                  |                  |                                                                                       |
|                              | <b>H</b> 38+ °C                                                                                            |                  |                  |                                |                  |                  |                                                                                       |
|                              | <b>M</b> 39+ °C                                                                                            |                  |                  |                                |                  |                  |                                                                                       |
|                              | Under 3 months of age                                                                                      |                  |                  |                                |                  |                  |                                                                                       |
|                              | 3-6 months of age                                                                                          |                  |                  |                                |                  |                  |                                                                                       |
| <b>Urine</b>                 | <b>H</b> Not passed urine in 18 hours                                                                      |                  |                  |                                |                  |                  |                                                                                       |
|                              | <b>M</b> Not passed urine in the last 12-18 hours                                                          |                  |                  |                                |                  |                  |                                                                                       |

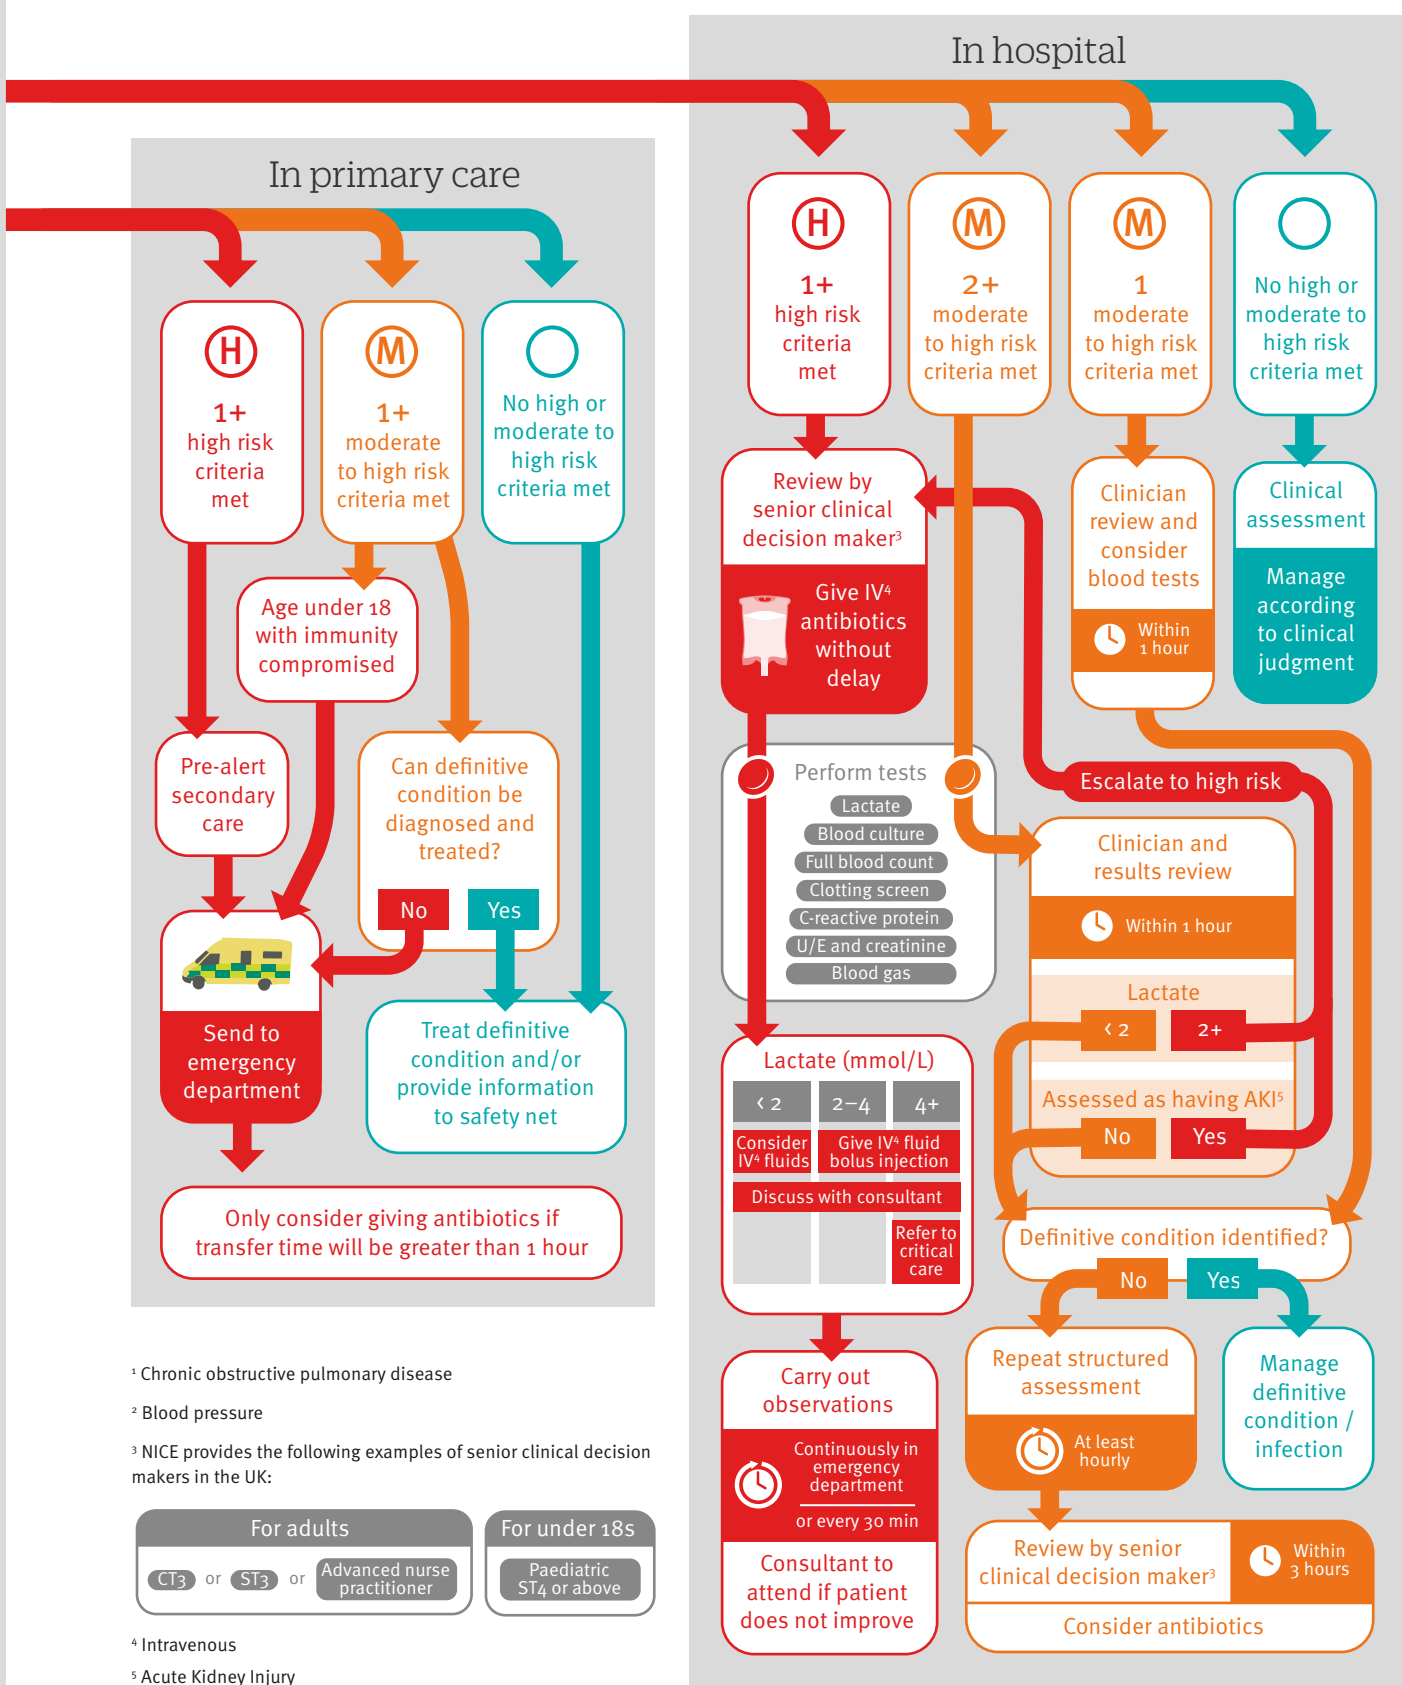

Supplement: sepsis_nice_v70_web.pdf [file sepsis_nice_v70_web.pdf]
